# Supplementary material
Source: PubMed Central journal article supplement (PMC5440199)
Supplement: NIHMS847173-supplement.pdf [file NIHMS847173-supplement.pdf]

## CONFLICT OF INTEREST STATEMENT

### *The Journal of Arthroplasty*

(Adopted from the American Academy of Orthopaedic Surgeons disclosure statement)

The following form **must be filled out completely and submitted by each author (example, 6 authors, 6 forms). If no discloser is required please write/type "none" at the end of each sentence.**

---

Manuscript Title: Specific infectious organisms associated with poor outcomes in treatment for hip peri-prosthetic infection

1. Royalties from a company or supplier (The following conflicts were disclosed)

None

2. Speakers bureau/paid presentations for a company or supplier (The following conflicts were disclosed)

3A. Paid employee for a company or supplier (The following conflicts were disclosed)

None

None

3B. Paid consultant for a company or supplier (The following conflicts were disclosed)

None

3C. Unpaid consultants for a company or supplier (The following conflicts were disclosed)

None

4. Stock or stock options in a company or supplier (The following conflicts were disclosed)

None

5. Research support from a company or supplier as a Principal Investigator (The following conflicts were disclosed)

None

6. Other financial or material support from a company or supplier (The following conflicts were disclosed)

None

7. Royalties, financial or material support from publishers (The following conflicts were disclosed)

None

8. Medical/Orthopaedic publications editorial/governing board (The following conflicts were disclosed)

None

9. Board member/committee appointments for a society (The following conflicts were disclosed)

None

**Each author must sign, print or type his/her name, date and submit a separate form**

**In addition, one BLINDED Conflict of Interest form (no author names used) should be submitted per manuscript with all author disclosures.**

Daniel Cunningham



08/26/2016

---

Author Name (Print or Type)

Author Signature

Date

# CONFLICT OF INTEREST STATEMENT

## The Journal of Arthroplasty

(Adopted from the American Academy of Orthopaedic Surgeons disclosure statement)

The following form must be filled out completely and submitted by each author (example, 6 authors, 6 forms). If no discloser is required, please write/type "none" at the end of each sentence.

Manuscript Title: ~~Retrospective Analysis of Periprosthetic Hip Infections: Results from a Single Center~~ *specific infectious organisms associated with poor outcomes in treatment for hip peri-prosthetic infection*

- 1. Royalties from a company or supplier (The following conflicts were disclosed)  
none
- 2. Speakers bureau/paid presentations for a company or supplier (The following conflicts were disclosed)  
none
- 3A. Paid employee for a company or supplier (The following conflicts were disclosed)  
none
- 3B. Paid consultant for a company or supplier (The following conflicts were disclosed)  
none
- 3C. Unpaid consultants for a company or supplier (The following conflicts were disclosed)  
none
- 4. Stock or stock options in a company or supplier (The following conflicts were disclosed)  
none
- 5. Research support from a company or supplier as a Principal Investigator (The following conflicts were disclosed)  
none
- 6. Other financial or material support from a company or supplier (The following conflicts were disclosed)  
none
- 7. Royalties, financial or material support from publishers (The following conflicts were disclosed)  
none
- 8. Medical/Orthopaedic publications editorial/governing board (The following conflicts were disclosed)  
none
- 9. Board member/committee appointments for a society (The following conflicts were disclosed)  
none

**Each author must sign AND print or type his/her name, date and submit a separate form**

In addition, one BLINDED Conflict of Interest form (no author names used) should be submitted per manuscript with all author disclosures.

Joseph Kavolus  
Author Name (Print or Type)

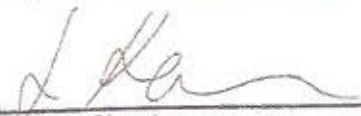  
Author Signature

8/23/16  
Date

# CONFLICT OF INTEREST STATEMENT

## *The Journal of Arthroplasty*

(Adopted from the American Academy of Orthopaedic Surgeons disclosure statement)

The following form **must be filled out completely and submitted by each author (example, 6 authors, 6 forms). If no discloser is required, please write/type "none" at the end of each sentence.**

- Manuscript Title *Specific infectious organisms associated with poor outcome in treatment for hip peri-prosthetic infection*
1. Royalties from a company or supplier (The following conflicts were disclosed) *Zimmer, Biomet*
  2. Speakers bureau/paid presentations for a company or supplier (The following conflicts were disclosed) *Zimmer, Biomet*
  - 3A. Paid employee for a company or supplier (The following conflicts were disclosed) *None*
  - 3B. Paid consultant for a company or supplier (The following conflicts were disclosed) *Zimmer Biomet, TJO*
  - 3C. Unpaid consultants for a company or supplier (The following conflicts were disclosed) *Amedica*
  4. Stock or stock options in a company or supplier (The following conflicts were disclosed) *Amedica, TJO*
  5. Research support from a company or supplier as a Principal Investigator (The following conflicts were disclosed) *Zimmer - Biomet, Exactech*
  6. Other financial or material support from a company or supplier (The following conflicts were disclosed) *None*
  7. Royalties, financial or material support from publishers (The following conflicts were disclosed) *None*
  8. Medical/Orthopaedic publications editorial/governing board (The following conflicts were disclosed) *AAHKS publications committee*
  9. Board member/committee appointments for a society (The following conflicts were disclosed) *AAHKS BOD, EOA BOD*

**Each author must sign AND print or type his/her name, date and submit a separate form**

In addition, one BLINDED Conflict of Interest form (no author names used) should be submitted per manuscript with all author disclosures.

*MICHAEL BILOGNESI*

Author Name (Print or Type)

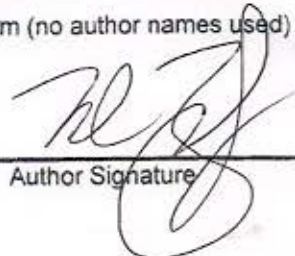

Author Signature

*8/26/16*

Date

# CONFLICT OF INTEREST STATEMENT

## *The Journal of Arthroplasty*

(Adopted from the American Academy of Orthopaedic Surgeons disclosure statement)

The following form **must be filled out completely and submitted by each author (example, 6 authors, 6 forms). If no discloser is required, please write/type "none" at the end of each sentence.**

- Manuscript Title *specific infectious organisms associated with poor outcomes in treatment for hip. peri-prosthetic infection*
1. Royalties from a company or supplier (The following conflicts were disclosed) *Total Joint Orthopedics*
  2. Speakers bureau/paid presentations for a company or supplier (The following conflicts were disclosed)  
*None*
  - 3A. Paid employee for a company or supplier (The following conflicts were disclosed)  
*None*
  - 3B. Paid consultant for a company or supplier (The following conflicts were disclosed)  
*Total Joint Orthopedics*
  - 3C. Unpaid consultants for a company or supplier (The following conflicts were disclosed)  
*None*
  4. Stock or stock options in a company or supplier (The following conflicts were disclosed)  
*None*
  5. Research support from a company or supplier as a Principal Investigator (The following conflicts were disclosed)  
*DePuy, Stryker, Zimmer - Biomet*
  6. Other financial or material support from a company or supplier (The following conflicts were disclosed)  
*None*
  7. Royalties, financial or material support from publishers (The following conflicts were disclosed)  
*None*
  8. Medical/Orthopaedic publications editorial/governing board (The following conflicts were disclosed)  
*Journal of Arthroplasty*
  9. Board member/committee appointments for a society (The following conflicts were disclosed)  
*None*

**Each author must sign AND print or type his/her name, date and submit a separate form**

In addition, one BLINDED Conflict of Interest form (no author names used) should be submitted per manuscript with all author disclosures.

*James Wellman* *[Signature]* *8/26/16*  
\_\_\_\_\_  
Author Name (Print or Type) Author Signature Date

# CONFLICT OF INTEREST STATEMENT

## *The Journal of Arthroplasty*

(Adopted from the American Academy of Orthopaedic Surgeons disclosure statement)

The following form **must be filled out completely and submitted by each author (example, 6 authors, 6 forms). If no discloser is required, please write/type "none" at the end of each sentence.**

Manuscript Title ~~Specific infectious organisms associated with poor outcomes in treatment for hip~~  
~~Common Medical Comorbidities Correlated with Poor Outcomes in Hip Peri-Prosthetic Infection~~  
1. Royalties from a company or supplier (The following conflicts were disclosed) *peri-prosthetic infection*

*Total Joint Orthopedics, Inc.*

2. Speakers bureau/paid presentations for a company or supplier (The following conflicts were disclosed)

*None*

3A. Paid employee for a company or supplier (The following conflicts were disclosed)

*None*

3B. Paid consultant for a company or supplier (The following conflicts were disclosed)

*Total Joint Orthopedics*

3C. Unpaid consultants for a company or supplier (The following conflicts were disclosed)

*None*

4. Stock or stock options in a company or supplier (The following conflicts were disclosed)

*None*

5. Research support from a company or supplier as a Principal Investigator (The following conflicts were disclosed)

*None*

6. Other financial or material support from a company or supplier (The following conflicts were disclosed)

*None*

7. Royalties, financial or material support from publishers (The following conflicts were disclosed)

*None*

8. Medical/Orthopaedic publications editorial/governing board (The following conflicts were disclosed)

*None*

9. Board member/committee appointments for a society (The following conflicts were disclosed)

*None*

**Each author must sign AND print or type his/her name, date and submit a separate form**

In addition, one BLINDED Conflict of Interest form (no author names used) should be submitted per manuscript with all author disclosures.

*THOMAS SEYLER*  
Author Name (Print or Type)

*Thomas Seyler*  
Author Signature

*8/25/2014*  
Date
